Martinez, et al. (2019)

1 **Rapid degradation of *C. elegans* proteins at single-cell resolution with a synthetic**  
2 **auxin**

3

4 Michael A. Q. Martinez\*, Brian A. Kinney†, Taylor N. Medwig-Kinney\*, Guinevere Ashley‡,  
5 James M. Ragle‡, Londen Johnson‡, Joseph Aguilera‡, Christopher M. Hammell†, Jordan  
6 D. Ward‡, David Q. Matus\*

7

8 \*Department of Biochemistry and Cell Biology, Stony Brook University, Stony Brook, NY  
9 11794, USA.

10

11 †Cold Spring Harbor Laboratory, Cold Spring Harbor, NY 11724, USA.

12

13 ‡Department of Molecular, Cell, and Developmental Biology, University of California-  
14 Santa Cruz, Santa Cruz, CA 95064, USA.

15

16

17

18

19

Martinez, et al. (2019)

20 Running title: Protein degradation via a synthetic auxin

21

22 Keywords: *C. elegans*; AID system; NAA; Microfluidics; SCF complex; NHR-25

23

24 Corresponding author: David Q. Matus; Department of Biochemistry and Cell Biology,

25 Stony Brook University, Stony Brook, NY 11794, USA; david.matus@stonybrook.edu

26

27

28

29

30

31

32

33

34

35

36

37

38

Martinez, et al. (2019)

39 **ABSTRACT**

40

41 As developmental biologists in the age of genome editing, we now have access to an  
42 ever-increasing array of tools to manipulate endogenous gene expression. The auxin-  
43 inducible degradation system, allows for spatial and temporal control of protein  
44 degradation, functioning through the activity of a hormone-inducible *Arabidopsis* F-box  
45 protein, transport inhibitor response 1 (TIR1). In the presence of auxin, TIR1 serves as a  
46 substrate recognition component of the E3 ubiquitin ligase complex SKP1-CUL1-F-box  
47 (SCF), ubiquitinating auxin-inducible degron (AID)-tagged proteins for proteasomal  
48 degradation. Here, we optimize the *Caenorhabditis elegans* AID method, utilizing 1-  
49 naphthaleneacetic acid (NAA), an indole-free synthetic analog of the natural auxin indole-  
50 3-acetic acid (IAA). We take advantage of the photostability of NAA to demonstrate via  
51 quantitative high-resolution microscopy that rapid degradation of target proteins can be  
52 detected in single cells within 30 minutes of exposure. Additionally, we show that NAA  
53 works robustly in both standard growth media and physiological buffer. We also  
54 demonstrate that K-NAA, the water-soluble, potassium salt of NAA, can be combined with  
55 microfluidics for targeted protein degradation in *C. elegans* larvae. We provide insight into  
56 how the AID system functions in *C. elegans* by determining that TIR1 interacts with *C.*  
57 *elegans* SKR-1/2, CUL-1, and RBX-1 to degrade target proteins. Finally, we present  
58 highly penetrant defects from NAA-mediated degradation of the Ftz-F1 nuclear hormone  
59 receptor, NHR-25, during *C. elegans* uterine-vulval development. Together, this work  
60 provides a conceptual improvement to the AID system for dissecting gene function at the  
61 single-cell level during *C. elegans* development.

Martinez, et al. (2019)

## 62 INTRODUCTION

63

64 *In situ* techniques for targeted protein degradation enable a detailed analysis of  
65 developmental events, mechanisms, and functions. RNAi and Cre or Flp-mediated  
66 recombination (Qadota *et al.* 2007; Hubbard 2014; Shen *et al.* 2014) allow tissue-specific  
67 study of gene products, but the persistence of the target protein following recombination  
68 or RNA depletion can delay the manifestation of an otherwise acute phenotype. Several  
69 methods have been described recently to enable tissue-specific protein degradation in  
70 *Caenorhabditis elegans*, including ZF1 tagging (Armenti *et al.* 2014), a GFP nanobody  
71 approach (Wang *et al.* 2017), sortase A (Wu *et al.* 2017), and auxin-mediated degradation  
72 (Zhang *et al.* 2015).

73

74 The auxin-inducible degradation system allows for rapid and conditional  
75 degradation of auxin-inducible degron (AID)-tagged proteins in *C. elegans* as well as in  
76 other commonly used model systems including yeast (Nishimura *et al.* 2009), *Drosophila*  
77 (Trost *et al.* 2016), zebrafish (Daniel *et al.* 2018), cultured mammalian cells (Nishimura *et*  
78 *al.* 2009; Holland *et al.* 2012; Natsume *et al.* 2016), and mouse oocytes (Camlin and  
79 Evans 2019). This protein degradation system relies on the expression of an *Arabidopsis*  
80 F-box protein called transport inhibitor response 1 (TIR1). As a substrate-recognition  
81 component of the SKP1-CUL1-F-box (SCF) E3 ubiquitin ligase complex, TIR1 carries out  
82 its function only in the presence of the hormone auxin. Once bound to auxin, TIR1 targets  
83 AID-tagged proteins for ubiquitin-dependent proteasomal degradation (**Figure 1A**).

Martinez, et al. (2019)

84           The *C. elegans* version of the AID system is robust and specific with minimal off-  
85 target effects (Zhang *et al.* 2015). However, re-evaluation of the system is needed to  
86 assess its utility among *C. elegans* researchers conducting microscopy-based single-cell  
87 biology within a narrow developmental time frame. Here, we use 1-naphthaleneacetic  
88 acid (NAA) and its water-soluble potassium salt analog (K-NAA), indole-free synthetic  
89 analogs of the natural auxin indole-3-acetic acid (IAA), to degrade target proteins at  
90 single-cell resolution in *C. elegans* larvae in standard growth media and physiological  
91 buffer. Given the ability to solubilize K-NAA solely in water or physiological buffer (M9),  
92 we also demonstrated rapid degradation kinetics of an AID-tagged transgene in a *C.*  
93 *elegans*-based microfluidics for the first time (Keil *et al.* 2017). Next, we sought to gain  
94 insight into which SCF complex members interact with TIR1, identifying *skr-1/2*, *cul-1* and  
95 *rbx-1* as putative TIR1 interactors through RNAi depletion experiments. Finally, we  
96 demonstrate potent temporal effects on uterine and vulval development following targeted  
97 degradation of endogenous NHR-25, the single *C. elegans* homolog of *Drosophila* Ftz-  
98 F1 and human SF-1 and LRH-1 (Chen *et al.* 2004; Ward *et al.* 2013). It is our hope that  
99 this synthetic auxin analog will be applied at all stages of *C. elegans* development,  
100 allowing for precise, rapid degradation of target proteins in a high-resolution and  
101 quantitative fashion.

102

103

104

105

Martinez, et al. (2019)

## 106 MATERIALS AND METHODS

107

### 108 ***C. elegans strains and culture conditions***

109 Animals were maintained using standard culture conditions at 25°C (Brenner 1974) and  
110 were synchronized through alkaline hypochlorite treatment of gravid adults to isolate eggs  
111 (Porta-de-la-Riva *et al.* 2012). In the main text and figure legends, we designate linkage  
112 to a promoter using a greater than symbol (>) and fusion to a protein using a double colon  
113 (::). The following alleles and transgenes were used in this manuscript for experimental  
114 purposes: LG I: *kry61[nhr-23::AID]*; LG II: *ieSi57[eft-3>TIR1::mRuby]*; LG IV: *ieSi58[eft-*  
115 *3>AID::GFP]*, *syIs49 [zmp-1>GFP]*; LG X: *wrd10[nhr-25::GFP::AID]*.

116

### 117 ***Constructs and microinjection***

118 SapTrap was used to construct the 30xlinker::GFP^SEC^TEV::AID degron::3xFLAG  
119 repair template (pJW1747) for generating the knock-in into the 3' end of the *nhr-25* gene  
120 (Schwartz and Jorgensen 2016). DH10β competent *E. coli* cells, made in-house, were  
121 used for generating the plasmid. The following reagents were used to assemble the final  
122 repair template: pDD379 (backbone with F+E sgRNA), annealed oligos 3482+3483  
123 (sgRNA), pJW1779 (5' homology arm), 3' homology arm PCR product, pJW1347 (30x  
124 linker for CT slot), pDD372 (GFP for FP slot), pDD363 (SEC with LoxP sites), and  
125 pJW1759 (TEV::AID degron::3xFLAG for NT slot).

126

Martinez, et al. (2019)

127           The pJW1747 repair template was purified using the Invitrogen PureLink HQ Mini  
128 Plasmid DNA Purification Kit (K210001). The optional wash step in the protocol using a  
129 4 M guanidine-HCl + 40% isopropanol solution is highly recommended, as excluding it  
130 dramatically reduced injection efficiency in our hands. N2 animals were injected with a  
131 mix consisting of 10 ng/μl of pJW1747, 50 ng/μl of pDD121 (Cas9 vector), and co-injection  
132 markers (10 ng/μl pGH8, 5 ng/μl pCFJ104, 2.5 ng/μl pCFJ90) as previously described  
133 (Frøkjær-Jensen *et al.* 2012; Dickinson *et al.* 2013, 2015). Knock-ins were isolated as  
134 previously described (Dickinson *et al.* 2015). Each knock-in junction was verified via PCR  
135 using a primer that bound outside the homology arm paired with a primer binding within  
136 pJW1747. The knock-in was backcrossed five times against wild-type N2 animals to  
137 produce JDW58. The SEC was then excised by heat-shock (Dickinson *et al.* 2015) to  
138 produce JDW59; the knock-in sequence was re-confirmed by PCR amplification and  
139 sequencing, using the oligos flanking the homology arms. JDW58 was crossed to CA1200  
140 (*eft-3>TIR1::mRuby*) to generate JDW70. The SEC was then excised (Dickinson *et al.*  
141 2015) to produce JDW71.

142

143           pDD121, pDD363, pDD372, and pDD379 (Dickinson *et al.* 2018) were gifts from  
144 Bob Goldstein (Addgene plasmid numbers are 91833, 91829, 91824, and 91834,  
145 respectively). pJW1347 and pJW1759 will be deposited into Addgene's repository and  
146 are also available upon request. pJW1347 and pJW1759 were generated by TOPO blunt  
147 cloning of PCR products. pJW1779 was generated by Gateway cloning into pDONR221  
148 (Invitrogen). Oligo sequences used to generate these plasmids, the sgRNA, the 3'  
149 homology arm, and for genotyping are in the Reagent Table.

Martinez, et al. (2019)

150 ***Auxin experiments***

151 For all auxin experiments, synchronized L1 larval stage animals were first transferred to  
152 standard nematode growth media (NGM) agar plates seeded with *E. coli* OP50 and then  
153 transferred at the P6.p 2-cell stage (mid-L3 stage) to either OP50-seeded NGM agar  
154 plates treated with IAA, NAA, or K-NAA, or M9 buffer treated with NAA in the absence of  
155 bacteria, NAA plus *E. coli* NA22, or K-NAA plus *E. coli* NA22.

156

157 For IAA and NAA experiments on plates, a 250 mM stock solution in 95% ethanol  
158 was prepared using powder IAA purchased from Alfa Aesar (A10556) and powder NAA  
159 purchased from Sigma-Aldrich (317918) and stored at -20°C. IAA and NAA were then  
160 diluted into the NGM agar (cooled to approximately 50°C) at the time of pouring plates.  
161 Fresh OP50 was used to seed plates. For control experiments, 0.25% ethanol was used  
162 as described previously (Zhang *et al.* 2015). For K-NAA experiments on plates, a 250 mM  
163 stock solution in deionized water was prepared using powder K-NAA purchased from  
164 PhytoTechnology Laboratories (N610) and stored at 4°C. For control experiments, OP50-  
165 seeded NGM agar plates were used. Prior to each NAA experiment in M9 buffer, a fresh  
166 1 mM (pH of 7.22) or 4 mM solution (pH of 8.14) in M9 buffer was prepared using 5.4 mM  
167 NAA purchased in liquid form from Sigma-Aldrich (N1641). These pH levels are well  
168 within the tolerance range of *C. elegans* for pH (Khanna *et al.* 1997). M9 buffer alone (pH  
169 of 7.13) was used as a control. A detailed protocol for liquid-based NAA-mediated  
170 degradation can be found in File S1. For experiments conducted in the microfluidic  
171 platform, a 4 mM NAA or K-NAA solution in M9 buffer containing *E. coli* NA22 was  
172 prepared and stored at 4°C for up to 2 weeks. M9 buffer containing NA22 was used as a



Martinez, et al. (2019)

173 control. See File S2 for a detailed protocol describing the preparation of media for the  
174 microfluidic device.

175

#### 176 **Brood size and viability assays**

177 Brood size and viability assays were performed as described (Zhang *et al.* 2015). Briefly,  
178 L4 hermaphrodites were picked onto individual MYOB plates containing 0% ethanol (K-  
179 NAA control), 0.25% ethanol (IAA control), 4 mM K-NAA, or 4 mM IAA. Animals were then  
180 transferred to new plates daily over 4 days. The eggs laid on each plate were counted  
181 after removing the parent and viable progeny were quantified when the F1 reached L4 or  
182 adult stages (2-3 days post egg-laying). At this point, we also scored for dead eggs. Brood  
183 size is the sum of live progeny and dead eggs. Percent embryonic lethality was  
184 determined by dividing dead eggs by total eggs laid.

185

#### 186 **RNAi experiments**

187 RNAi targeting *cul-1* was constructed by cloning 997 bp of synthetic DNA based on its  
188 cDNA sequence available on WormBase ([wormbase.org](http://wormbase.org)) into the highly efficient T444T  
189 RNAi vector (Sturm *et al.* 2018). The synthetic DNA was generated by Integrated DNA  
190 Technologies (IDT) as a gBlock gene fragment and cloned into the BgIII/Sall restriction  
191 digested T444T vector using the NEBuilder HiFi DNA Assembly Master Mix (E2621).  
192 RNAi feeding strains silencing *skr-1/2*, *skr-7*, *skr-10*, and *rbx-1* were obtained from the  
193 Vidal RNAi library (Rual *et al.* 2004).

Martinez, et al. (2019)

194 ***Scoring defects in anchor cell (AC) specification***

195 Synchronized L1 stage *nhr-25::GFP::AID; eft-3>TIR1::mRuby* animals were plated onto  
196 NGM agar plates containing either control or 4 mM NAA and grown for 24 hours at 25°C  
197 until the early L3 stage (P6.p 1-cell stage), after the normal time of AC specification.  
198 Images were acquired as specified below to score for the presence or absence of an AC,  
199 visualized by characteristic morphology using DIC optics.

200

201 ***Scoring vulva precursor cell (VPC) arrest***

202 Synchronized L1 stage *nhr-25::GFP::AID; eft-3>TIR1::mRuby* animals were plated onto  
203 OP50 NGM agar plates and allowed to grow until the P6.p 1-cell stage. Animals were  
204 then washed off plates with M9 and transferred onto NGM agar plates containing either  
205 control or 4 mM NAA and grown at 25°C until the mid-L3 stage, after the normal time of  
206 P6.p cell division. Images were acquired as specified below to score for P6.p divisions  
207 using DIC optics. Remaining animals were scored for plate level adult phenotypes  
208 approximately 24 hours later.

209

210 ***Image acquisition***

211 Images were acquired using a Hamamatsu Orca EMCCD camera and a Borealis-  
212 modified Yokagawa CSU-10 spinning disk confocal microscope (Nobska Imaging, Inc.)  
213 with a Plan-APOCHROMAT x 100/1.4 oil DIC objective controlled by MetaMorph software  
214 (version: 7.8.12.0). Animals were anesthetized on 5% agarose pads containing 10 mM

Martinez, et al. (2019)

215 sodium azide and secured with a coverslip. Imaging on the microfluidic device was  
216 performed on a Zeiss AXIO Observer.Z7 inverted microscope using a 40X glycerol  
217 immersion objective and DIC and GFP filters controlled by ZEN software (version 2.5).  
218 Images were captured using a Hamamatsu C11440 digital camera. For scoring plate level  
219 phenotypes, images were acquired using a Moticam CMOS (Motic) camera attached to  
220 a Zeiss dissecting microscope.

221

## 222 ***Image processing and analyses***

223 All acquired images were processed using Fiji software (version: 2.0.0-rc-69/1.52p)  
224 (Schindelin *et al.* 2012). To quantify AC- or VPC-specific degradation of AID::GFP,  
225 images were captured at the P6.p 2-cell stage and 4-cell stage (mid-L3 stage) at time  
226 points 0, 30, 60, 90, and 120 minutes in the absence or presence of auxin. Expression of  
227 *eft-3>AID::GFP* was quantified by measuring the mean fluorescence intensity (MFI) of  
228 ACs and VPCs subtracted by the MFI of a background region in the image to account for  
229 camera noise. Cells were outlined using the freehand selection tool in Fiji. Data were  
230 normalized by dividing the MFI in treated or untreated animals at time points 30, 60, 90,  
231 and 120 minutes by the average MFI in untreated animals at 0 minutes. For experiments  
232 utilizing RNAi, only ACs were measured due to the variable sensitivity of VPCs to RNAi  
233 (Bourdages *et al.* 2014; Matus *et al.* 2014). To quantify AC-specific degradation of  
234 AID::GFP in animals fed RNAi overnight, images were captured at the P6.p 2-cell stage  
235 before auxin treatment and 60 minutes post-treatment. *eft-3>AID::GFP* expression in the  
236 AC was quantified as described above. Data were normalized by dividing the MFI in auxin  
237 treated animals by the average MFI in untreated animals. To analyze *nhr-25::GFP::AID*

Martinez, et al. (2019)

238 degradation, GFP levels were quantified by measuring the MFI in individual GFP-  
239 expressing nuclei in the AC/VU, AC, or VPCs subtracted by the MFI of a background  
240 region in the image to account for background noise. Nuclei were outlined using the  
241 threshold tool in Fiji or for animals with no detectable GFP signal, the corresponding DIC  
242 image was utilized to identify the nucleus. Images of L3 larvae were captured in a *C.*  
243 *elegans* larvae-specific microfluidic device (Keil *et al.* 2017). To quantify AID::GFP  
244 degradation, animals were loaded into the microfluidic chamber and fed NA22 bacteria.  
245 Images were captured at time points 0, 30, 60, 90, and 120 minutes with or without auxin.  
246 Here, *eft-3>AID::GFP* expression was quantified by measuring the MFI in whole animals  
247 subtracted by the MFI of a background region in the image to account for background  
248 noise. Whole animals were outlined using the freehand selection tool in Fiji. Data were  
249 normalized by dividing the MFI in treated or untreated animals at time points 30, 60, 90,  
250 and 120 minutes by the average MFI in untreated animals at timepoints 30, 60, 90, and  
251 120 minutes respectively to account for photobleaching from imaging the same animal.  
252 Cartoons were created with BioRender (biorender.com) and ChemDraw software  
253 (version: 18.0). Graphs were generated using Prism software (version: 8.1.2). Figures  
254 were compiled using Adobe Photoshop (version: 20.0.6) and Illustrator (version: 23.0.26).

255

## 256 ***Statistical analyses***

257 A power analysis was performed to determine the sample size (*n*) needed per experiment  
258 to achieve a power level of 0.80 or greater (Cohen 1992; Pollard *et al.* 2019). Statistical  
259 significance was determined using either a two-tailed unpaired Student's t-test or Mann  
260 Whitney U test.  $P < 0.05$  was considered statistically significant. The figure legends

Martinez, et al. (2019)

261 specify when error bars represent the standard deviation (SD) or interquartile range  
262 (IQR).

263

#### 264 ***Data availability***

265 Supplemental data and key reagents can be found at Figshare. Worm strains CA1202,  
266 CA1204, and PS3239 are available to order from the *Caenorhabditis* Genetics Center. All  
267 other strains are available upon request. The data that support the findings of this study  
268 are available upon reasonable request.

269

## 270 **RESULTS AND DISCUSSION**

271

### 272 ***NAA is a synthetic alternative to the natural auxin IAA***

273 Given the recent advances in CRISPR/Cas9-genome editing technology (Dickinson and  
274 Goldstein 2016; Dokshin *et al.* 2018), the auxin-inducible degron (AID) with or without a  
275 fluorescent reporter (e.g., GFP or its derivatives) can be inserted into a genomic locus of  
276 interest (Röth *et al.* 2019). Though this technology can be applied with ease, there are  
277 certain limitations that exist with the use of the natural auxin indole-3-acetic acid (IAA),  
278 including its limited solubility in water. While levels of the ethanol solvent used to dissolve  
279 IAA (0.25–1.52%) are well below the threshold for causing a physiologic response  
280 (Morgan and Sedensky 1995; Kwon *et al.* 2004), higher percentages of ethanol (7%) have  
281 been shown to cause rapid changes in *C. elegans* gene expression (Kwon *et al.* 2004).

Martinez, et al. (2019)

282 A potentially more problematic limitation of IAA for live-cell imaging-based applications is  
283 cytotoxicity related to excitation with UV and blue light. Specifically, IAA has been shown  
284 in yeast (Papagiannakis *et al.* 2017) and mouse oocytes (Camlin and Evans 2019) to  
285 cause cytotoxicity, likely due to acceleration of the oxidative decarboxylation of IAA to  
286 methylene-oxindole (Srivastava 2002). In yeast, IAA exposure during live-cell imaging  
287 suppressed cell proliferation (Papagiannakis *et al.* 2017) and mammalian oocytes failed  
288 to complete meiotic maturation (Camlin and Evans 2019). In both systems, the use of a  
289 synthetic auxin, 1-naphthaleneacetic acid (NAA), rescued these cytotoxic responses. For  
290 these reasons, we chose to examine whether NAA would also function in *C. elegans* to  
291 degrade AID-tagged proteins in the presence of TIR1. Ultimately, we wished to evaluate  
292 AID-mediated degradation (**Figure 1A**) in single cells and tissues using live-cell imaging.  
293 Thus, we determined the kinetics of protein degradation using spinning disk confocal  
294 microscopy, rather than using low-magnification microscopy and Western blot analysis to  
295 measure protein loss in whole animals, as performed previously (Zhang *et al.* 2015). We  
296 chose to focus primarily on the L3 stage of post-embryonic development due to many of  
297 the dynamic cellular behaviors occurring over relatively short time scales (within minutes  
298 to hours) in this developmental window, including uterine-vulval attachment and vulval  
299 morphogenesis (**Figure 1B**) (Gupta *et al.* 2012).

300

301 To analyze the kinetics of AID-mediated degradation in the uterine anchor cell (AC)  
302 and underlying vulva precursor cells (VPCs) (**Figure 1B**), we utilized a previously  
303 published strain expressing AID::GFP and TIR1::mRuby under the same ubiquitously  
304 expressed *eft-3* promoter (Zhang *et al.* 2015). The single-cell abundance of AID::GFP

Martinez, et al. (2019)

305 was measured over time in mid-L3 stage animals exposed to different concentrations of  
306 auxin incorporated into standard *C. elegans* solid culture media (**Figure 2A**). In addition  
307 to testing the natural auxin IAA, also tested whether it was possible to perform auxin-  
308 inducible degradation in the AC and VPCs using the synthetic auxin analog NAA (**Figure**  
309 **2B**). In the presence of  $\geq 1$  mM IAA or NAA, AID::GFP abundance in the AC and VPCs  
310 was reduced by approximately 80% of its initial level within 30 minutes (**Figure 2C-D**).  
311 Within 60 minutes, AID::GFP was virtually undetectable (**Figure 2C-D**). These results  
312 indicate that NAA can serve as a viable substitute to IAA. These results indicate that NAA  
313 can serve as a viable substitute for IAA. Similar to (Zhang *et al.* 2015), we observed that  
314 growth on IAA resulted in similar brood sizes compared to control (**Table S1**). Growth on  
315 the potassium salt of NAA (K-NAA) resulted in similar brood sizes compared to control,  
316 and also produced a modest but significant ( $P = 0.02$ ) reduction in embryonic lethality  
317 compared to IAA treatment (**Table S1**). Consistent with this result, higher levels of toxicity  
318 was observed when using IAA over NAA in studies investigating circadian rhythm biology  
319 in *Drosophila* (Chen *et al.* 2018). Zhang *et al.* (2015) reported inhibited bacterial growth  
320 at high concentrations of auxin. Compared to bacterial growth on IAA and NAA, we  
321 observed more robust OP50 growth on K-NAA with no trade-off in degradation rate  
322 (**Figure S1A**). Together, these results demonstrate that NAA is a viable alternative to IAA  
323 for targeted protein degradation in *C. elegans* larvae.

324

### 325 ***NAA is soluble in physiological buffer***

326 To compare degradation kinetics on plate-based growth to depletion in liquid culture  
327 during imaging, we measured AID::GFP abundance in the AC and VPCs in mid-L3 stage

Martinez, et al. (2019)

328 animals exposed to different concentrations of NAA solubilized in M9 buffer (**Figure 3A-**  
329 **D**). In the presence of  $\geq 1$  mM liquid NAA, AID::GFP in the AC and VPCs was reduced by  
330 80%, as compared to initial levels, within 30 minutes and was nearly undetectable within  
331 60 minutes (**Figure 3B-D**). These results show that NAA can induce auxin-dependent  
332 degradation in liquid culture in *C. elegans*, reducing the need to rear animals on auxin  
333 plates and transfer to slides for imaging. This finding raises the possibility of depleting  
334 proteins and imaging the resulting developmental consequences at single-cell resolution.

335

### 336 ***K-NAA is an option for C. elegans researchers employing microfluidics***

337 The ability to easily solubilize NAA in physiological buffer raises the possibility of  
338 performing protein degradation experiments paired with microfluidics where individual  
339 animals can be imaged over long periods at cellular resolution. *C. elegans* lifespan and  
340 behavioral assays can involve, subtle phenotypes sensitive to environmental  
341 perturbations. Accordingly, the low level of ethanol present in IAA plates is not optimal for  
342 these types of assays. The reduced bacterial growth on ethanol and IAA could also affect  
343 nutrition (**Figure S1A**) (Cabreiro *et al.* 2013), making water soluble K-NAA an attractive  
344 alternative. To compare degradation kinetics between NAA and K-NAA, we time-lapsed  
345 L3 stage animals using a microfluidic device optimized for long-term imaging of *C.*  
346 *elegans* larvae (Keil *et al.* 2017), assessing depletion of ubiquitously expressed AID::GFP  
347 in trapped animals (**Figure 3A**). At the L3 stage, animals were loaded into the microfluidic  
348 chamber in M9 and flushed with a mixture of M9, 4 mM NAA or K-NAA, and NA22 *E. coli*  
349 as a bacterial food source (Keil *et al.* 2017). The animals were imaged every 30 minutes  
350 for 2 hours. During image acquisition, animals were temporarily immobilized by manually



Martinez, et al. (2019)

351 increasing the negative pressure on the compression layer of the device (Keil *et al.* 2017).  
352 Between timepoints, animals were allowed to move and feed freely in 4 mM NAA or K-  
353 NAA combined with NA22 in M9. Although degradation kinetics were slower than those  
354 observed in NAA solubilized in M9 alone (**Figure 3B-D**) or NGM plates containing NAA  
355 or K-NAA (**Figure S1B-C**), we still observed approximately 60–70% reduction of  
356 AID::GFP expression within the first 30 minutes of NAA or K-NAA exposure, and nearly  
357 80% depletion of whole animal AID::GFP within 1 hour (**Figure 3E-F**). Our results may  
358 be under-representing the overall loss of AID::GFP as we did not account for gut  
359 autofluorescence in our quantification of fluorescence intensity in whole animals  
360 (Teuscher and Ewald 2018). Nonetheless, our results demonstrate that AID-tagged  
361 proteins can be depleted in a microfluidic platform which, when combined with long-term  
362 high-resolution imaging, provides a powerful tool for studying post-embryonic *C. elegans*  
363 development at cellular resolution.

364

365 ***The AID system functions through specific components of the C. elegans SCF***  
366 ***complex to degrade target proteins***

367 Our work demonstrates that the AID system functions rapidly to degrade target proteins  
368 in *C. elegans* as described previously (Zhang *et al.* 2015). As a heterologous system,  
369 researchers have shown in yeast that *Arabidopsis* TIR1 interacts with the *S. cerevisiae*  
370 Cul1 homolog, Cdc53 (Nishimura *et al.* 2009). Whether *Arabidopsis* TIR1 also functions  
371 through *C. elegans* proteins homologous to yeast SCF proteins is unknown. Thus, to  
372 examine interactions between TIR1 and SCF complex proteins in *C. elegans*, we used  
373 RNAi technology directed against components of the SCF complex and quantified

Martinez, et al. (2019)

374 AID::GFP in the presence and absence of NAA (**Figure 4 and Figures S2-S3**). This  
375 experiment was designed to provide insight into the mechanism through which the AID  
376 system depletes target proteins in *C. elegans* and as an intersectional proof-of-concept  
377 test of combining auxin-based depletion with a RNAi feeding approach. Briefly, the SCF  
378 complex consists of three components: SKP1, CUL1, and RBX1. In contrast to yeast and  
379 humans, which contain only one functional SKP1 protein, the scaffold protein CUL-1 is  
380 known to interact with eight of the Skp1-related adaptor proteins in *C. elegans*, including  
381 SKR-1, -2, -3, -4, -7, -8, -9 and -10 (Nayak *et al.* 2002; Yamanaka *et al.* 2002). We first  
382 perturbed *cul-1* expression. To deplete CUL-1, we generated a new RNAi construct  
383 targeting *cul-1* in the upgraded T444T RNAi targeting vector (Sturm *et al.* 2018). Notably,  
384 this vector contains T7 terminator sequences, which prevents non-specific RNA  
385 fragments from being synthesized from the vector backbone (Sturm *et al.* 2018). This  
386 vector modification increases the efficiency of mRNA silencing over the original L4440  
387 vector (Sturm *et al.* 2018).

388

389 We hypothesized that depleting CUL-1 would strongly interfere with the  
390 proteasomal machinery and thus protein turnover. To assess the abundance of AID::GFP  
391 in the *C. elegans* AC, we treated animals with either *control(RNAi)* or *cul-1(RNAi)*. As  
392 before, we made use of a strain expressing AID::GFP and TIR1::mRuby from an *eft-3*  
393 driver (Zhang *et al.* 2015), and we examined animals at the P6.p 2-cell stage (**Figure 4A**).  
394 RNAi knockdown of *cul-1* resulted in a modest but statistically significant increase in the  
395 abundance of AID::GFP in the AC compared to *control(RNAi)* treatment (+19%,  $n = 31$   
396 and 33, respectively,  $P < 0.0001$ ) (**Figure 4C**). This result suggests that there is TIR-

Martinez, et al. (2019)

397 dependent, auxin-independent depletion of AID::GFP, similar to reports in other systems  
398 (Morawska and Ulrich 2013; Nishimura and Fukagawa 2017; Zasadzińska *et al.* 2018).  
399 To further test this notion, we assessed GFP abundance in the AC in animals lacking  
400 TIR1::mRuby. AID::GFP and GFP were driven by *eft-3* and *zmp-1* promoters,  
401 respectively, and we performed the experiment on animals at the P6.p 2-cell stage. We  
402 did not assess AID::GFP abundance in the VPCs due to the variable sensitivity of this  
403 tissue to RNAi (compare **Figure 4A and S2**) (Bourdages *et al.* 2014; Matus *et al.* 2014).  
404 Depletion of CUL-1 in animals expressing AID::GFP (-1.8%,  $n = 29$  for both treatments,  
405  $P = 0.1168$ ; **Figure S3A-B**) or GFP (-2.4%,  $n = 20$  for both RNAi treatments,  $P = 0.7682$ ;  
406 **Figure S3C-D**) resulted in a slight decrease in GFP abundance, though it was not  
407 statistically significant in either case compared to treatment with *control(RNAi)*. The  
408 modest decrease in protein abundance in animals lacking TIR1::mRuby suggests that  
409 knockdown of *cul-1* might mildly perturb protein homeostasis, but TIR1-mediated  
410 proteosomal degradation of AID-tagged proteins independent of auxin exposure  
411 requires endogenous levels of CUL-1 to function robustly.

412

413 Next, we tested whether depletion of *cul-1* would inactivate AID-mediated protein  
414 degradation. We fed synchronized L1 stage animals with RNAi targeting *cul-1*, and then  
415 treated animals at the P6.p 2-cell stage with 1 mM NAA for 60 minutes before quantifying  
416 AID::GFP degradation in the AC (**Figure 4A**). For *control(RNAi)*-treated animals, the  
417 abundance of AID::GFP in the AC was nearly undetectable within 60 minutes (-94%,  $n =$   
418 33; **Figure 4D**). Remarkably, the abundance of AID::GFP in the AC was reduced by only

Martinez, et al. (2019)

419 29% within 60 minutes for animals treated with *cul-1(RNAi)* ( $n = 31$ ,  $P < 0.0001$ ; **Figure**  
420 **4D**).

421

422 We next wanted to determine if any of the Skp1-related proteins in *C. elegans*  
423 function as adaptors that link CUL-1 to the F-box protein TIR1 to mediate degradation of  
424 AID-tagged target proteins. Based on the availability of RNAi clones, we fed synchronized  
425 L1 stage animals with RNAi targeting four of the eight Skp1-related adaptors known to  
426 interact with CUL-1; *skr-1*, *skr-2*, *skr-7*, and *skr-10* (Nayak *et al.* 2002; Yamanaka *et al.*  
427 2002). Owing to the 83% sequence homology between *skr-1* and *skr-2* likely stemming  
428 from a gene duplication event and predicted cross-RNAi effects, their gene names are  
429 unified in this report as *skr-1/2* similar to (Nayak *et al.* 2002). Of all the Skp1 homologs,  
430 *C. elegans skr-1* and human Skp1 share the greatest sequence homology (Yamanaka *et*  
431 *al.* 2002). We also fed animals RNAi targeting *rbx-1*, which encodes the RING finger  
432 protein in the SCF E3 ubiquitin ligase (Yamanaka *et al.* 2002). To assess AID::GFP  
433 abundance in the AC, we again used animals expressing *eft-3>AID::GFP* and *eft-*  
434 *3>TIR1::mRuby* and examined animals at the P6.p 2-cell stage (**Figure 4B**). RNAi  
435 knockdown of *skr-1/2* compared to *control(RNAi)* led to differences in AID::GFP  
436 abundance that were not statistically significant ( $n = 23$  and 20, respectively,  $P = 0.3522$ ).  
437 However, similar to *cul-1(RNAi)*, RNAi silencing of *rbx-1* ( $n = 22$ ) resulted in a statistically  
438 significant increase in the abundance of AID::GFP in the AC compared to *control(RNAi)*  
439 treatment ( $P = 0.0283$ ) (**Figure 4E**). Interestingly, both *skr-7(RNAi)* ( $n = 23$ ) and *skr-*  
440 *10(RNAi)* ( $n = 21$ ) resulted in a statistically significant decrease in AID::GFP abundance  
441 compared to control ( $P < 0.0001$ ).

Martinez, et al. (2019)

442 We also wanted to determine whether depletion of *skr-1/2*, *skr-7*, *skr-10*, and *rbx-*  
443 *1* could inactivate AID-mediated protein degradation. We fed synchronized L1 stage  
444 animals with RNAi targeting these SCF complex components. We treated animals at the  
445 P6.p 2-cell stage with 1 mM NAA for 60 minutes and quantified AID::GFP degradation in  
446 the AC (**Figure 4F**). For *control(RNAi)*-treated animals, the abundance of AID::GFP in the  
447 AC was once again nearly undetectable within 60 minutes (-96%,  $n = 21$ ) (**Figure 4F**).  
448 Similarly, the AID::GFP abundance in animals treated with *skr-7(RNAi)* ( $n = 21$ ) and *skr-*  
449 *10(RNAi)* ( $n = 21$ ) was undetectable within 60 minutes of NAA exposure (-94% and -93%,  
450 respectively). For animals treated with *skr-1/2(RNAi)* ( $n = 21$ ,  $P < 0.0001$ ), the abundance  
451 of AID::GFP in the AC was reduced by 57% within 60 minutes (**Figure 4F**). For animals  
452 treated with *rbx-1(RNAi)* ( $n = 23$ ,  $P < 0.0001$ ), the abundance of AID::GFP in the AC was  
453 reduced by 65% within 60 minutes (**Figure 4F**). These results suggest that: 1)  
454 suppression of *cul-1*, *skr-1/2*, or *rbx-1* is sufficient to block TIR1-mediated degradation,  
455 while suppression of *skr-7* or *skr-10* is not; 2) TIR1 functions as a substrate recognition  
456 component of the *C. elegans* CUL-1-based SCF complex, which was also previously  
457 shown in yeast (Nishimura *et al.* 2009); and 3) it is possible to deplete multiple targets  
458 simultaneously using both AID and RNAi technology.

459  
460 Inhibiting the expression of *cul-1*, *skr-1/2*, or *rbx-1* is a valid approach for reversing  
461 AID-mediated degradation in *C. elegans*. We suggest using *cul-1*, *skr-1/2* or *rbx-1(RNAi)*  
462 for this purpose with caution, as they have known cell cycle-dependent functions and  
463 therefore silencing them may conflate the recovery of AID-tagged proteins with a cell  
464 cycle phenotype (Kipreos *et al.* 1996). As an alternative approach to achieving recovery

Martinez, et al. (2019)

465 of AID-tagged proteins, we propose the use of RNAi targeting TIR1 or simply using  
466 auxinole, a commercially available inhibitor of TIR1 (Hayashi *et al.* 2012; Yesbolatova *et*  
467 *al.* 2019). One caveat to this approach is that auxinole is expensive and thus it may be  
468 difficult to obtain stoichiometrically equivalent amounts of auxin and auxinole to truly  
469 achieve recovery of one's protein of interest. However, for *C. elegans* researchers  
470 requiring tighter temporal control, these may be avenues worth exploring. Presently,  
471 recovery from degradation with 1 mM auxin takes up to 24 hours to fully recover  
472 expression of the target protein (Zhang *et al.* 2015). Such protein recovery kinetics are  
473 insufficient for studying events in the nematode that occur within minutes to hours such  
474 as uterine-vulval attachment, vulval morphogenesis, or many other developmental events  
475 occurring post-embryonically.

476

#### 477 ***NAA as a tool for exploring phenotypes during development and beyond***

478 As our previous results demonstrate that we could effectively deplete a non-functional  
479 AID::GFP reporter expressed in the uterine AC and VPCs, we next tested whether NAA-  
480 mediated depletion of target proteins could be utilized to study post-embryonic  
481 developmental events occurring over a tight temporal window. We focused on a well-  
482 studied system of organogenesis, *C. elegans* uterine-vulval cell specification and  
483 morphogenesis (**Figure 1B**) (Schindler and Sherwood 2013). As a proof-of-principle, we  
484 chose to deplete the nuclear hormone receptor, *nhr-25*, a homolog of arthropod Ftz-F1  
485 and vertebrate SF-1/NR5A1 and LRH-1/NR5A2, which has been shown to function  
486 pleiotropically in a wide array of developmental events, from larval molting (Asahina *et al.*  
487 2000; Gissendanner and Sluder 2000; Frand *et al.* 2005), heterochrony (Hada *et al.*

Martinez, et al. (2019)

488 2010), and uterine-vulval morphogenesis (Chen *et al.* 2004; Hwang and Sternberg 2004;  
489 Asahina *et al.* 2006; Hwang *et al.* 2007; Ward *et al.* 2013). It was this pleiotropy that made  
490 targeting NHR-25 an attractive target, as RNAi and mutant analyses have shown  
491 previously that it is initially required in the AC during the AC/VU decision for proper  
492 specification of AC fate (Hwang and Sternberg 2004; Asahina *et al.* 2006) and  
493 approximately 7 hours later it is required in the underlying VPCs for cell division (Chen *et*  
494 *al.* 2004; Hwang *et al.* 2007; Ward *et al.* 2013).

495  
496 First, we examined the *nhr-25::GFP::AID* expression pattern, and observed GFP  
497 localization to the nuclei of the AC/VU cells during the mid-L2 stage, enrichment in the  
498 AC following specification, and nuclear localization in the 1° and 2° VPCs during all stages  
499 of vulval division and morphogenesis (**Figure 5A**). We quantified GFP fluorescence over  
500 developmental time. Consistent with previous reports based on transgene analyses  
501 (Gissendanner and Sluder 2000; Ward *et al.* 2013), endogenous *nhr-25::GFP::AID* AC  
502 expression peaks after AC specification in the early L3 at the P6.p 1-cell stage and is  
503 undetectable above background by the P6.p 4-cell stage at the time of AC invasion.  
504 Conversely, *nhr-25::GFP::AID* increases in intensity in the VPCs at the P6.p 4-cell stage,  
505 peaking during the morphogenetic events following AC invasion (**Figure 5B**). Given this  
506 temporally-driven expression pattern and based on previous experimental results from  
507 RNAi and mutant analyses (Chen *et al.* 2004; Hwang and Sternberg 2004; Asahina *et al.*  
508 2006; Hwang *et al.* 2007; Ward *et al.* 2013), we hypothesized that depleting AID-tagged  
509 NHR-25 prior to AC specification should interfere with the AC/VU decision. To test this  
510 hypothesis, we used synchronized L1 stage animals expressing *eft-3>TIR1::mRuby* and

Martinez, et al. (2019)

511 endogenously tagged NHR-25::GFP::AID. We exposed these larvae to 4 mM NAA or a  
512 buffer control and examined animals in the early L3 stage, after the normal time of AC  
513 specification. Strikingly, all 36 animals examined showed a failure to specify the AC fate,  
514 with the presence of either one (10/36) or two (26/36) small AC/VU-like cells in the central  
515 gonad as compared to control animals (**Figure 5C**). Next, we repeated the experiment  
516 but waited until after AC specification, in the early L3 stage, to expose animals to buffer  
517 control or 4 mM NAA. Here, in all animals, we detected the presence of an AC situated  
518 over P6.p, but in 34 of the 36 animals, P6.p failed to divide as compared to controls at  
519 the mid-L3 stage (**Figure 5E**). Quantification of *nhr-25::GFP::AID* in AC/VU cells (**Figure**  
520 **5D**) and VPCs (**Figure 5F**) demonstrated the 4 mM NAA treatment robustly depleted  
521 endogenous protein by 95% in the AC/VU and 81% in the VPCs, respectively. Finally, we  
522 waited until treated animals (early L3 stage) became adults (approximately 24 hours later)  
523 and examined them for plate level phenotypes. We saw a 100% Egg-laying defect (Egl)  
524 in 4 mM NAA treated animals as compared to control treated plates (**Figure 5G**).  
525 Together, these results indicate that the synthetic auxin, NAA, can robustly deplete target  
526 endogenous proteins in a facile, high-throughput fashion during uterine-vulval  
527 development. This method should prove valuable in dissecting pleiotropic gene function  
528 in the future.

529

### 530 ***Important caveats of the C. elegans AID system***

531 Our results reported here with a synthetic auxin, NAA, as well as the initial report  
532 developing the *C. elegans* AID system (Zhang *et al.* 2015) clearly demonstrate the  
533 effectiveness of auxin-induced targeted protein depletion. Several other recent reports



Martinez, et al. (2019)

534 have also effectively used the AID system in *C. elegans* to control protein function,  
535 including controlling spermatogenesis by manipulating *spe-44* levels (Kasimatis *et al.*  
536 2018), depleting a mediator component to modulate longevity (Lee *et al.* 2019), examining  
537 chromosome segregation during oogenesis (Ferrandiz *et al.* 2018), meiotic crossover  
538 (Zhang *et al.* 2018), and revealing novel roles of neuronal gene function through  
539 conditional depletion (Serrano-Saiz *et al.* 2018). Despite the increasing frequency of AID  
540 system usage in the *C. elegans* community, there are only a handful of TIR1 driver lines  
541 published, and the importance of copy number and promoter strength has not been  
542 systematically assessed.

543

544 While we are optimistic that the use of the synthetic analog of auxin presented  
545 here will allow for even more widespread utility of the AID system in the *C. elegans*  
546 research community, there are still are some areas open to improvement for the  
547 technology. A recent report in mammalian cell culture identified that AID-tagged proteins  
548 are depleted in an auxin-independent fashion in the presence of TIR1, relative to wild-  
549 type levels (Li *et al.* 2019; Sathyan *et al.* 2019). We examined if this was also occurring  
550 in *C. elegans* strains in our laboratory expressing AID-tagged proteins and TIR1. We were  
551 able to detect statistically significant auxin-independent depletion of both a ubiquitously  
552 expressed AID::GFP transgene under the *eft-3* promoter in ACs (-22%,  $n = 24$ ,  $P <$   
553 0.0001) and VPCs (-24%,  $n = 24$ ,  $P < 0.0001$ ; **Figure S4A-B**) and an endogenously  
554 tagged *nhr-25::GFP::AID* allele in ACs (-22%,  $n = 26$ ,  $P = 0.0022$ ) and VPCs (-35%,  $n =$   
555 26,  $P < 0.0001$ ; **Figure S4C-D**). As partial loss of an endogenous protein could generate  
556 a hypomorphic condition, both from the placement of the AID tag and apparent triggering

Martinez, et al. (2019)

557 of the degradation machinery, we urge caution in carefully evaluating AID-tagged alleles  
558 paired with TIR1, independent of auxin delivery. Further optimization of the AID system  
559 in *C. elegans* will hopefully ameliorate this concern, as researchers recently used the  
560 heterologous co-expression of an auxin response factor (ARF) with TIR1 to rescue auxin-  
561 independent degradation in mammalian cell culture (Sathyan *et al.* 2019).

562

### 563 **Conclusion**

564 The ease of editing the *C. elegans* genome using CRISPR/Cas9-based approaches  
565 (Calarco and Friedland 2015) and heterologous gene manipulation tools is ushering in a  
566 new era of cellular and developmental biology. Several new tools available to *C. elegans*  
567 researchers require the insertion of small amino acid tags into target loci, including ZF1  
568 tagging (Armenti *et al.* 2014), sortase A (Wu *et al.* 2017), and the AID system (Zhang *et*  
569 *al.* 2015). Alternatively, any GFP fusion can be targeted via a GFP nanobody tethered to  
570 ZIF1 (Wang *et al.* 2017). These genomic edits are then paired with single transgene  
571 expression to allow for targeted spatial and temporal loss-of-function approaches through  
572 manipulation of endogenous loci. Prior to their advent, spatial and temporal control of  
573 protein function was largely missing from the *C. elegans* genomic toolkit. With an ever-  
574 increasing set of these tools being optimized for *C. elegans*, it is clear that different tools  
575 will have strengths and weaknesses depending on multiple variables, including  
576 subcellular localization of target protein, availability of tissue- and cell-type specific  
577 drivers, and inducibility of depletion. Here, we optimize a powerful heterologous system,  
578 the auxin-inducible degradation system. We demonstrate that a synthetic auxin analog,  
579 NAA, and its water-soluble, potassium salt, K-NAA, can function equivalently to natural

Martinez, et al. (2019)

580 auxin. The water solubility permits easier preparation of media and allows researchers to  
581 perform experiments in liquid culture and microfluidics. Importantly, the use of ethanol  
582 free K-NAA may be beneficial to *C. elegans* researchers studying behavior and aging,  
583 where introduction of ethanol may lead to confounding results. We also demonstrate the  
584 strength of the AID system for studying developmental cell biology by examining multiple  
585 spatial and temporal roles of the Ftz-F1 homolog *nhr-25* during uterine and vulval  
586 morphogenesis. It is our hope that the use of the synthetic auxin NAA will complement  
587 the AID system in *C. elegans* when examining targeted protein depletion phenotypes in  
588 tissues and developmental stages of interest. As the library of tissue-specific TIR1 drivers  
589 continues to grow, we envision researchers being able to rapidly degrade proteins of  
590 interest in specific tissues and visualize the outcome at single-cell resolution.

591

## 592 **ACKNOWLEDGEMENTS**

593 We thank R. Adikes for the suggestion to look into a water-soluble form of auxin and B.  
594 Lacroix of the Vitaly Citovsky lab for providing the initial aliquot of NAA. We thank R.  
595 Adikes, J. Smith and N. Palmisano for insightful discussions while developing the liquid  
596 based NAA protocol and R. Adikes for helpful advice regarding image acquisition  
597 parameters and quantification. We thank N. Stec of the Christopher Hammell lab for help  
598 with the microfluidic device. We thank M. Li and N. Kim of the Jessica Seeliger lab for  
599 help with the *E. coli* OP50 growth curve. We thank R. Adikes, N. Palmisano, A. Kohrman  
600 and A. Nishimura for advice and comments on the manuscript. We appreciate the help of  
601 W. Zhang for preparing media and plates.

Martinez, et al. (2019)

602 This work was funded by the National Institute of Health (NIH) National Institute of  
603 General Medical Sciences (NIGMS) [1R01GM121597-01 to D.Q.M.]. D.Q.M. is also a  
604 Damon Runyon-Rachleff Innovator supported (in part) by the Damon Runyon Cancer  
605 Research Foundation [DRR-47-17]. M.A.Q.M. is supported by the NIH NIGMS  
606 [2T32GM007518-41] and [3R01GM121597-02S2]. T.N.M. is supported by the NIH  
607 NICHD [1F31HD100091-01]. C.M.H and B.A.K. are supported by the NIH NIGMS  
608 [R01GM117406]. J.D.W. is supported by the NIH NIGMS [R00GM-107345]. Some strains  
609 were provided by the *Caenorhabditis* Genetics Center, which is funded by the NIH Office  
610 of Research Infrastructure Programs [P40 OD010440].

611

## 612 **AUTHOR CONTRIBUTIONS**

613 M.A.Q.M. and D.Q.M conceived and designed the experiments. G.A. and J.D.W.  
614 designed the constructs. J.M.R. performed the microinjections. G.A. performed the  
615 crosses and characterized strains. M.A.Q.M, B.A.K., T.N.M., L.J. and J.A. performed the  
616 experiments. M.A.Q.M. and D.Q.M. analyzed and quantified the data. M.A.Q.M. and  
617 D.Q.M. wrote the manuscript with contributions from the other authors. The authors  
618 declare no competing interests.

619

620

Martinez, et al. (2019)

## LITERATURE CITED

Armenti, S. T., L. L. Lohmer, D. R. Sherwood, and J. Nance, 2014 Repurposing an endogenous degradation system for rapid and targeted depletion of *C. elegans* proteins. *Development* 141: 4640–4647.

Asahina, M., T. Ishihara, M. Jindra, Y. Kohara, I. Katsura *et al.*, 2000 The conserved nuclear receptor Ftz-F1 is required for embryogenesis, moulting and reproduction in *Caenorhabditis elegans*. *Genes to Cells* 5: 711–723.

Asahina, M., T. Valenta, M. Silhankova, V. Korinek, and M. Jindra, 2006 Crosstalk between a Nuclear Receptor and  $\beta$ -Catenin Signaling Decides Cell Fates in the *C. elegans* Somatic Gonad. *Dev. Cell* 11: 203–211.

Bourdages, K. G., B. Lacroix, J. F. Dorn, C. P. Descovich, and A. S. Maddox, 2014 Quantitative analysis of cytokinesis In Situ during *C. Elegans* postembryonic development. *PLoS One* 9:.

Brenner, S., 1974 The genetics of *Caenorhabditis elegans*. *Genetics* 77: 71–94.

Cabreiro, F., C. Au, K. Y. Leung, N. Vergara-Irigaray, H. M. Cochemé *et al.*, 2013 Metformin retards aging in *C. elegans* by altering microbial folate and methionine metabolism. *Cell* 153: 228–239.

Calarco, J. A., and A. E. Friedland, 2015 *Creating Genome Modifications in C. elegans Using the CRISPR/Cas9 System*.

Camlin, N. J., and J. P. Evans, 2019 Auxin-inducible protein degradation as a novel approach for protein depletion and reverse genetic discoveries in mammalian

Martinez, et al. (2019)

oocytes. Biol. Reprod.

Chen, Z., D. J. Eastburn, and M. Han, 2004 The *Caenorhabditis elegans* Nuclear Receptor Gene *nhr-25* Regulates Epidermal Cell Development. Mol. Cell. Biol. 24: 7345–7358.

Chen, W., M. Werdann, and Y. Zhang, 2018 The auxin-inducible degradation system enables conditional PERIOD protein depletion in the nervous system of *Drosophila melanogaster*. FEBS J. 285: 4378–4393.

Cohen, J., 1992 A Power Primer. Psychol. Bull. 112: 155–159.

Daniel, K., J. Icha, C. Horenburg, D. Müller, C. Norden *et al.*, 2018 Conditional control of fluorescent protein degradation by an auxin-dependent nanobody. Nat. Commun. 9:.

Dickinson, D. J., and B. Goldstein, 2016 CRISPR-based methods for *Caenorhabditis elegans* genome engineering. Genetics 202: 885–901.

Dickinson, D. J., A. M. Pani, J. K. Heppert, C. D. Higgins, and B. Goldstein, 2015 Streamlined Genome Engineering with a Self-Excising Drug Selection Cassette. 200: 1035–1049.

Dickinson, D. J., M. M. Slabodnick, A. H. Chen, and B. Goldstein, 2018 SapTrap assembly of repair templates for Cas9-triggered homologous recombination with a self-excising cassette. microPublication Biol.

Dickinson, D. J., J. D. Ward, D. J. Reiner, and B. Goldstein, 2013 Engineering the *Caenorhabditis elegans* genome using Cas9-triggered homologous recombination.

Martinez, et al. (2019)

Nat. Methods 10: 1028–1034.

Dokshin, G. A., K. S. Ghanta, K. M. Piscopo, and C. C. Mello, 2018 Robust genome editing with short single-stranded and long, partially single-stranded DNA donors in *Caenorhabditis elegans*. *Genetics* 210: 781–787.

Ferrandiz, N., C. Barroso, O. Telecan, N. Shao, H. M. Kim *et al.*, 2018 Spatiotemporal regulation of Aurora B recruitment ensures release of cohesion during *C. Elegans* oocyte meiosis. *Nat. Commun.* 9: 1–16.

Frand, A. R., S. Russel, and G. Ruvkun, 2005 Functional genomic analysis of *C. elegans* molting. *PLoS Biol.* 3:

Frøkjær-Jensen, C., M. W. Davis, M. Ailion, and E. M. Jorgensen, 2012 Improved Mos1-mediated transgenesis in *C. elegans*. *Nat. Methods* 9: 117–118.

Gissendanner, C. R., and A. E. Sluder, 2000 *nhr-25*, the *Caenorhabditis elegans* ortholog of *ftz-f1*, is required for epidermal and somatic gonad development. *Dev. Biol.* 221: 259–272.

Gupta, B. P., W. Hanna-Rose, and P. W. Sternberg, 2012 Morphogenesis of the vulva and the vulval-uterine connection. *WormBook* 1–20.

Hada, K., M. Asahina, H. Hasegawa, Y. Kanaho, F. J. Slack *et al.*, 2010 The nuclear receptor gene *nhr-25* plays multiple roles in the *Caenorhabditis elegans* heterochronic gene network to control the larva-to-adult transition. *Dev. Biol.* 344: 1100–1109.

Hayashi, K. I., J. Neve, M. Hirose, A. Kuboki, Y. Shimada *et al.*, 2012 Rational design of

Martinez, et al. (2019)

an auxin antagonist of the SCF TIR1 auxin receptor complex. *ACS Chem. Biol.* 7: 590–598.

Holland, A. J., D. Fachinetti, J. S. Han, and D. W. Cleveland, 2012 Inducible, reversible system for the rapid and complete degradation of proteins in mammalian cells. *Proc. Natl. Acad. Sci.* 109: E3350–E3357.

Hubbard, E. J. A., 2014 FLP/FRT and Cre/lox recombination technology in *C. elegans*. *Methods* 68: 417–424.

Hwang, B. J., A. D. Meruelo, and P. W. Sternberg, 2007 *C. elegans* EVI1 proto-oncogene, EGL-43, is necessary for Notch-mediated cell fate specification and regulates cell invasion. *Development* 134: 669–679.

Hwang, B. J., and P. W. Sternberg, 2004 A cell-specific enhancer that specifies *lin-3* expression in the *C. elegans* anchor cell for vulval development. *Development* 131: 143–151.

Kasimatis, K. R., M. J. Moerdyk-Schauwecker, and P. C. Phillips, 2018 Auxin-mediated sterility induction system for longevity and mating studies in *Caenorhabditis elegans*. *G3 Genes, Genomes, Genet.* 8: 2655–2662.

Keil, W., L. M. Kutscher, S. Shaham, and E. D. Siggia, 2017 Long-Term High-Resolution Imaging of Developing *C. elegans* Larvae with Microfluidics. *Dev. Cell* 40: 202–214.

Khanna, N., C. P. C. Iii, C. P. Tatara, and P. L. Williams, 1997 Environmental Contamination and Toxicology Tolerance of the Nematode *Caenorhabditis elegans*



Martinez, et al. (2019)

to pH , Salinity , and Hardness in Aquatic Media. Arch. Environ. Contam. Toxicol. 114: 110–114.

Kipreos, E. T., L. E. Lander, J. P. Wing, W. W. He, and E. M. Hedgecock, 1996 *cul-1* is required for cell cycle exit in *C. elegans* and identifies a novel gene family. Cell 85: 829–839.

Kwon, J. Y., M. Hong, M. S. Choi, S. Kang, K. Duke *et al.*, 2004 Ethanol-response genes and their regulation analyzed by a microarray and comparative genomic approach in the nematode *Caenorhabditis elegans*. Genomics 83: 600–614.

Lee, D., S. W. A. An, Y. Jung, Y. Yamaoka, Y. Ryu *et al.*, 2019 MDT-15/MED15 permits longevity at low temperature via enhancing lipidostasis and proteostasis. PLOS Biol. 17: e3000415.

Li, S., X. Prasanna, V. T. Salo, I. Vattulainen, and E. Ikonen, 2019 An efficient auxin-inducible degron system with low basal degradation in human cells. Nat. Methods 16: 866–869.

Matus, D. Q., E. Chang, S. C. Makohon-Moore, M. A. Hagedorn, Q. Chi *et al.*, 2014 Cell division and targeted cell cycle arrest opens and stabilizes basement membrane gaps. Nat. Commun. 5: 1–13.

Morawska, M., and H. D. Ulrich, 2013 An expanded tool kit for the auxin-inducible degron system in budding yeast. Yeast 30: 341–351.

Morgan, P. G., and M. M. Sedensky, 1995 Mutations Affecting Sensitivity to Ethanol in the Nematode, *Caenorhabditis elegans*. Alcohol. Clin. Exp. Res. 19: 1423–1429.

Martinez, et al. (2019)

Natsume, T., T. Kiyomitsu, Y. Saga, and M. T. Kanemaki, 2016 Rapid Protein Depletion in Human Cells by Auxin-Inducible Degron Tagging with Short Homology Donors. *Cell Rep.* 15: 210–218.

Nayak, S., F. E. Santiago, H. Jin, D. Lin, T. Schedl *et al.*, 2002 The *Caenorhabditis elegans* Skp1-related gene family: Diverse functions in cell proliferation, morphogenesis, and meiosis. *Curr. Biol.* 12: 277–287.

Nishimura, K., and T. Fukagawa, 2017 An efficient method to generate conditional knockout cell lines for essential genes by combination of auxin-inducible degron tag and CRISPR/Cas9. *Chromosom. Res.* 25: 253–260.

Nishimura, K., T. Fukagawa, H. Takisawa, T. Kakimoto, and M. Kanemaki, 2009 An auxin-based degron system for the rapid depletion of proteins in nonplant cells. *Nat. Methods* 6: 917–922.

Papagiannakis, A., J. J. De Jonge, Z. Zhang, and M. Heinemann, 2017 Quantitative characterization of the auxin-inducible degron: A guide for dynamic protein depletion in single yeast cells. *Sci. Rep.* 7: 1–13.

Pollard, D. A., T. D. Pollard, and K. S. Pollard, 2019 Empowering statistical methods for cellular and molecular biologists. *Mol. Biol. Cell* 30: 1359–1368.

Porta-de-la-Riva, M., L. Fontrodona, A. Villanueva, and J. Cerón, 2012 Basic *Caenorhabditis elegans* Methods: Synchronization and Observation. *J. Vis. Exp.* 1–9.

Qadota, H., M. Inoue, T. Hikita, M. Köppen, J. D. Hardin *et al.*, 2007 Establishment of a

Martinez, et al. (2019)

tissue-specific RNAi system in *C. elegans*. *Gene* 400: 166–173.

Röth, S., L. J. Fulcher, and G. P. Sapkota, 2019 Advances in targeted degradation of endogenous proteins. *Cell. Mol. Life Sci.*

Rual, J.-F., J. Ceron, J. Koreth, T. Hao, A.-S. Nicot *et al.*, 2004 Toward Improving *Caenorhabditis elegans* Phenome Mapping With an ORFeome-Based RNAi Library. *Genome Res.* 14: 2162–2168.

Sathyan, K. M., B. D. McKenna, W. D. Anderson, F. M. Duarte, L. Core *et al.*, 2019 An improved auxin-inducible degron system preserves native protein levels and enables rapid and specific protein depletion. *Genes Dev.* 1–15.

Schindelin, J., I. Arganda-Carreras, E. Frise, V. Kaynig, M. Longair *et al.*, 2012 Fiji: an open-source platform for biological-image analysis. *Nat. Methods* 9: 676–82.

Schindler, A. J., and D. R. Sherwood, 2013 Morphogenesis of the *Caenorhabditis elegans* vulva. *Wiley Interdiscip. Rev. Dev. Biol.* 2: 75–95.

Schwartz, M. L., and E. M. Jorgensen, 2016 SapTrap, a toolkit for high-throughput CRISPR/Cas9 gene modification in *Caenorhabditis elegans*. *Genetics* 202: 1277–1288.

Serrano-Saiz, E., E. Leyva-Díaz, E. De La Cruz, and O. Hobert, 2018 BRN3-type POU Homeobox Genes Maintain the Identity of Mature Postmitotic Neurons in Nematodes and Mice. *Curr. Biol.* 28: 2813-2823.e2.

Shen, Z., X. Zhang, Y. Chai, Z. Zhu, P. Yi *et al.*, 2014 Conditional knockouts generated by engineered CRISPR-Cas9 endonuclease reveal the roles of coronin in *c.elegans*

Martinez, et al. (2019)

neural development. *Dev. Cell* 30: 625–636.

Srivastava, L. M., 2002 *CHAPTER 6 - Auxins*. Academic Press.

Sturm, Á., É. Saskoi, K. Tibor, N. Weinhardt, and T. Vellai, 2018 Highly efficient RNAi and Cas9-based auto-cloning systems for *C. elegans* research. *Nucleic Acids Res.* 46: e105.

Teuscher, A., and C. Ewald, 2018 Overcoming Autofluorescence to Assess GFP Expression During Normal Physiology and Aging in *Caenorhabditis elegans*. *Bio-Protocol* 8:.

Trost, M., A. C. Blattner, and C. F. Lehner, 2016 Regulated protein depletion by the auxin-inducible degradation system in *Drosophila melanogaster*. *Fly (Austin)*. 10: 35–46.

Wang, S., N. H. Tang, P. Lara-Gonzalez, Z. Zhao, D. K. Cheerambathur *et al.*, 2017 A toolkit for GFP-mediated tissue-specific protein degradation in *C. elegans*. *Development* 144: 2694–2701.

Ward, J. D., N. Bojanala, T. Bernal, K. Ashrafi, M. Asahina *et al.*, 2013 Sumoylated NHR-25/NR5A Regulates Cell Fate during *C. elegans* Vulval Development. *PLoS Genet.* 9:.

Wu, Q., H. L. Ploegh, and M. C. Truttmann, 2017 Hepta-Mutant *Staphylococcus aureus* Sortase A (SrtA7m) as a Tool for in Vivo Protein Labeling in *Caenorhabditis elegans*. *ACS Chem. Biol.* 12: 664–673.

Yamanaka, A., M. Yada, H. Imaki, M. Koga, Y. Ohshima *et al.*, 2002 Multiple Skp1-

Martinez, et al. (2019)

related proteins in *Caenorhabditis elegans*: Diverse patterns of interaction with Cullins and F-box proteins. *Curr. Biol.* 12: 267–275.

Yesbolatova, A., T. Natsume, K. ichiro Hayashi, and M. T. Kanemaki, 2019 Generation of conditional auxin-inducible degron (AID) cells and tight control of degron-fused proteins using the degradation inhibitor auxinole. *Methods* 0–1.

Zasadzińska, E., J. Huang, A. O. Bailey, L. Y. Guo, N. S. Lee *et al.*, 2018 Inheritance of CENP-A Nucleosomes during DNA Replication Requires HJURP. *Dev. Cell* 47: 348-362.e7.

Zhang, L., S. Köhler, R. Rillo-Bohn, and A. F. Dernburg, 2018 A compartmentalized signaling network mediates crossover control in meiosis. *Elife* 7: 1–32.

Zhang, L., J. D. Ward, Z. Cheng, and A. F. Dernburg, 2015 The auxin-inducible degradation (AID) system enables versatile conditional protein depletion in *C. elegans*. *Development* 142: 4374–4384.

Martinez, et al. (2019)

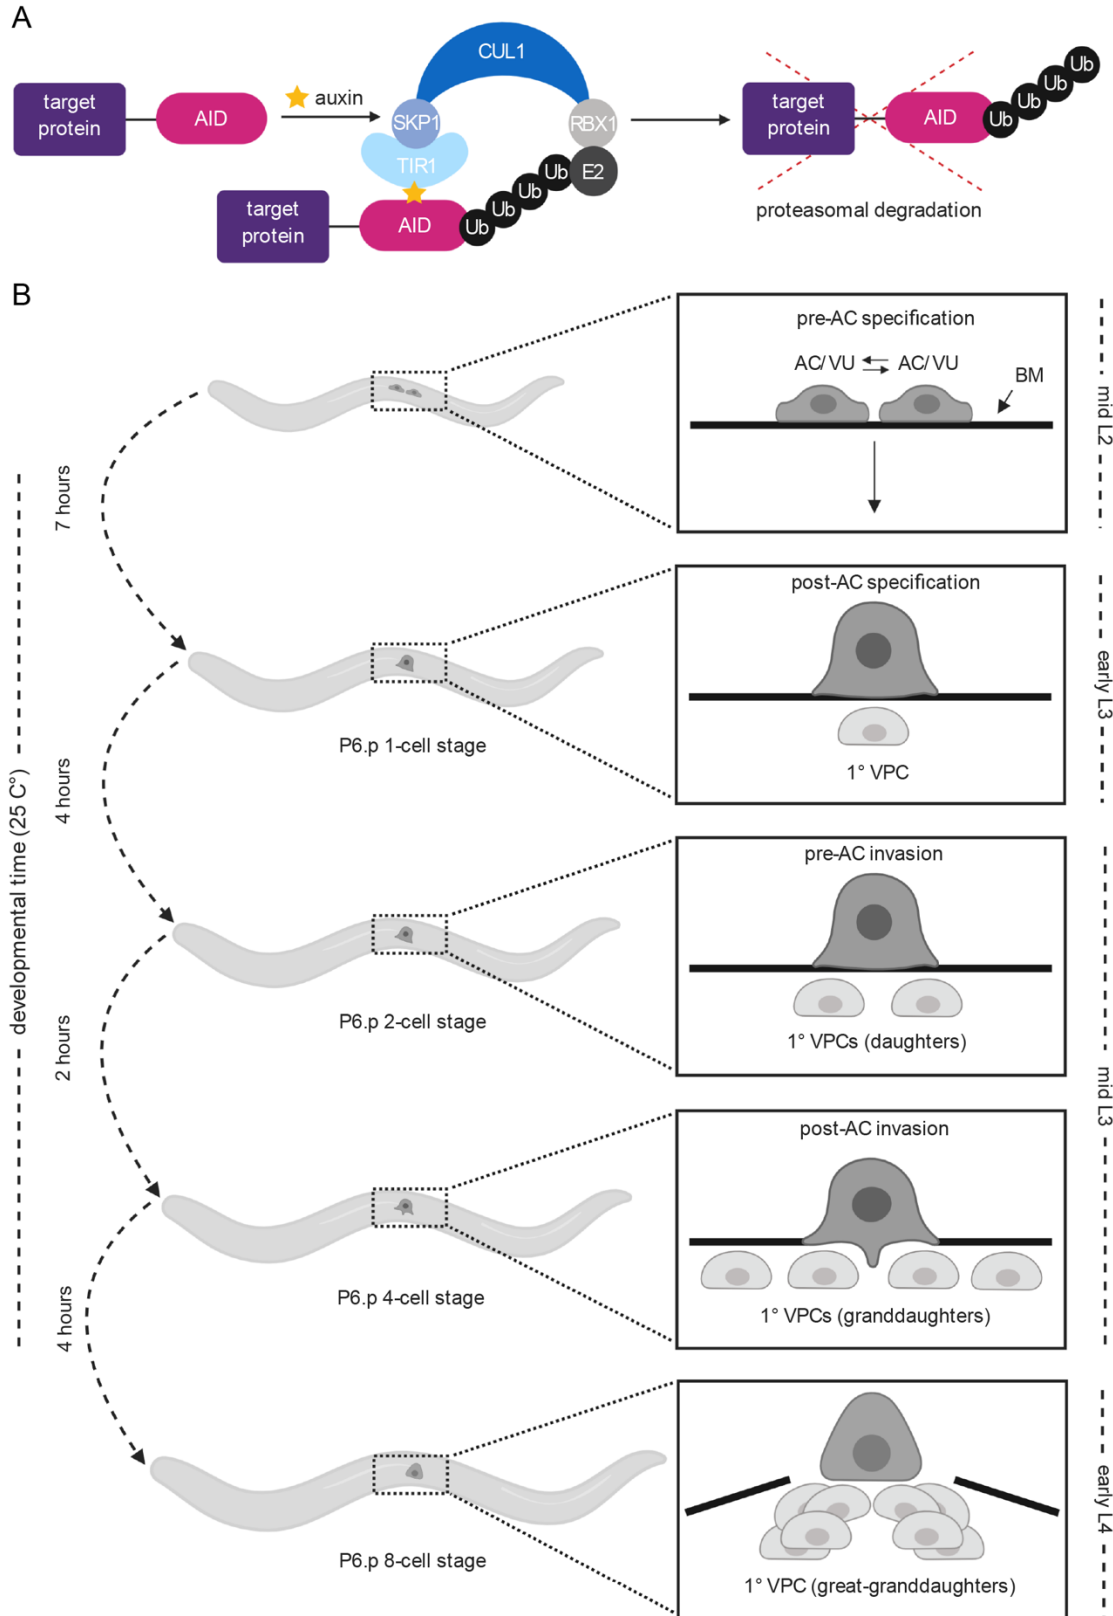

Martinez, et al. (2019)

**Figure 1. Overview of the auxin-inducible degradation system and *C. elegans* uterine-vulval development.** (A) In this system, a target protein is fused to an auxin-inducible degron (AID). Heterologous expression of *Arabidopsis* TIR1 mediates robust auxin-dependent proteasomal degradation of AID-tagged proteins through the SKP1-CUL1-F-box (SCF) E3 ubiquitin ligase complex. (B) Schematic of uterine-vulval morphogenesis during *C. elegans* larval development. In *C. elegans*, AC specification and morphogenesis of uterine-vulval attachment occurs from the mid-L2 through the early L4 stage (Schindler and Sherwood 2013). The AC is specified in a stochastic reciprocal Notch-Delta signaling event in the mid-L2 stage (top panel). Following AC specification, the AC specifies the 1° fate of the underlying vulval precursor cell, P6.p in the early L3 (second panel), which then divides three times to ultimately give rise to eight of the 22 cells of the adult vulva (bottom three panels).

Martinez, et al. (2019)

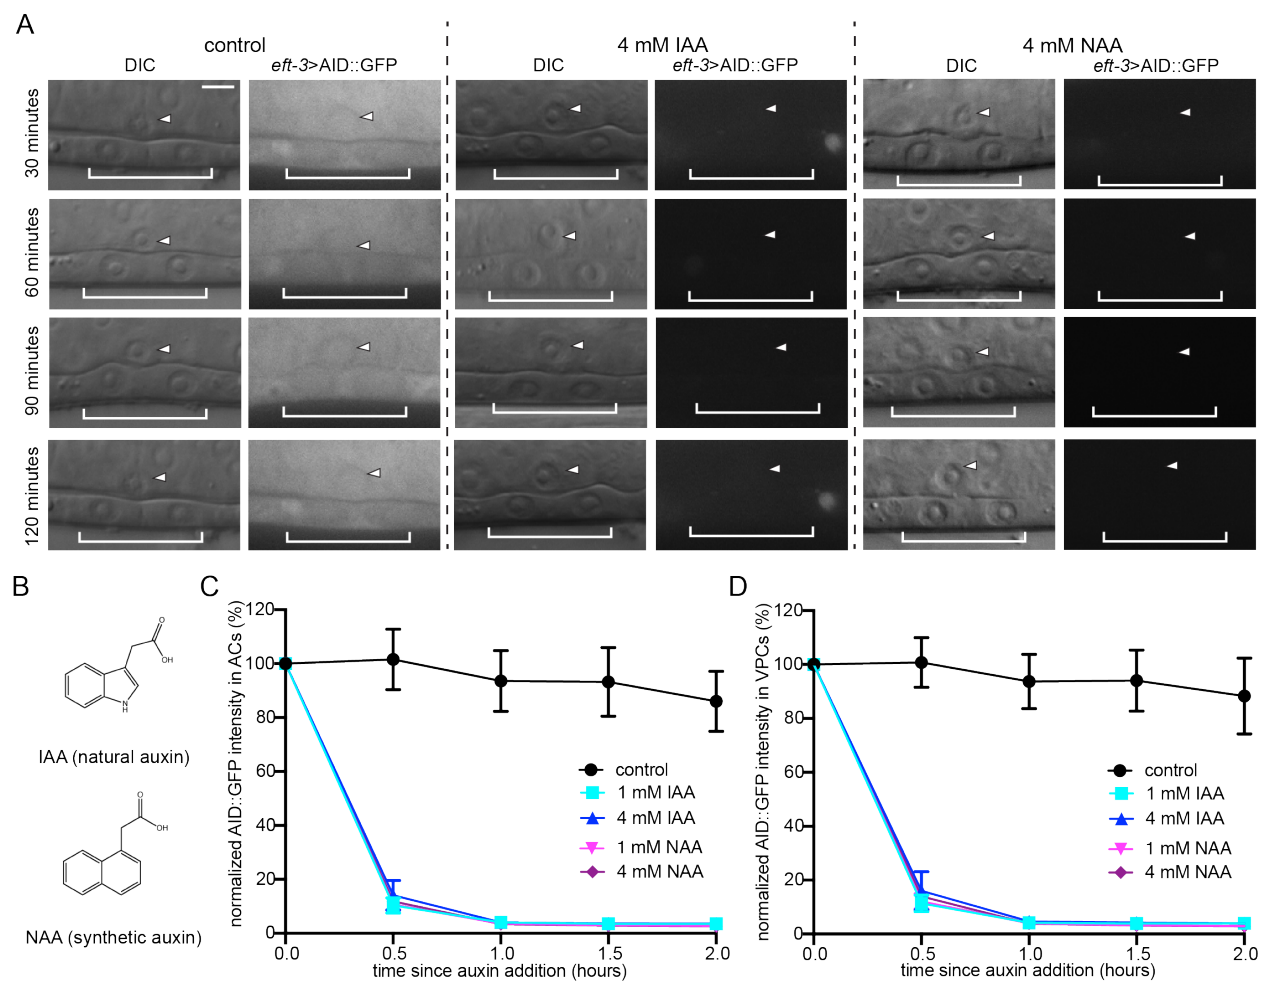

**Figure 2. Comparison of IAA- and NAA-mediated degradation in the *C. elegans* AC and VPCs.** (A) DIC and corresponding GFP images of ACs (arrowheads) and underlying 1° fated VPCs (brackets) from mid-L3 stage animals at the P6.p 2-cell stage. Animals expressing AID::GFP and TIR1::mRuby under the same *eft-3* promoter were treated with natural auxin indole-3-acetic acid (IAA) and synthetic auxin 1-naphthaleneacetic acid (NAA) in NGM agar containing OP50. (B) Chemical structure of IAA and NAA. (C, D) Rates of degradation determined by quantifying AID::GFP in (C) ACs and (D) VPCs



Martinez, et al. (2019)

following auxin treatment. Data presented as the mean $\pm$ SD ( $n \geq 30$  animals examined for each time point).

Martinez, et al. (2019)

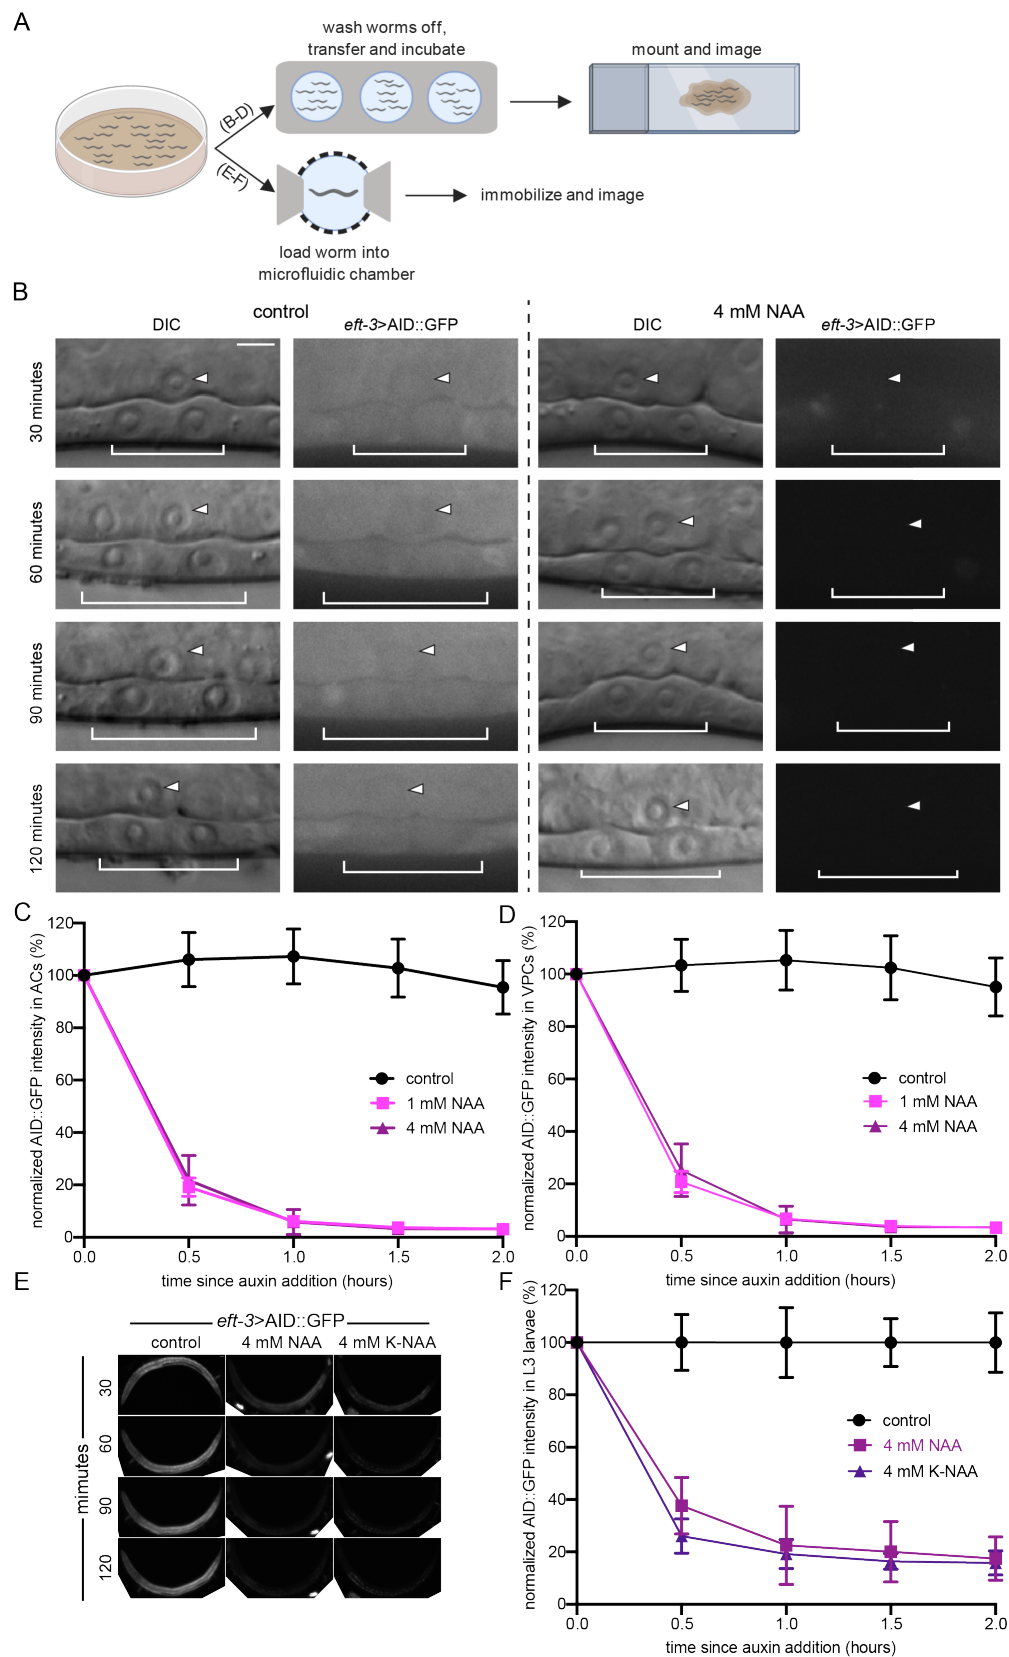

Martinez, et al. (2019)

**Figure 3. Solubility of NAA/K-NAA in physiological buffer enhances utility.** (A) Schematic representation of the liquid NAA-based degradation protocol for use in high-resolution microscopy or microfluidics-based approaches. (B) DIC and corresponding GFP images of ACs (arrowheads) and underlying VPCs (brackets) from mid-L3 stage animals at the P6.p 2-cell stage. Animals expressing AID::GFP and TIR1::mRuby under the same *eft-3* promoter were treated with NAA in M9. (C, D) Rates of degradation were determined by quantifying AID::GFP in (C) ACs and (D) VPCs following auxin treatment. Data presented as the mean $\pm$ SD ( $n \geq 30$  animals examined for each time point). (E) Images of AID::GFP expression from mid-L3 stage animals in control conditions (M9 buffer containing NA22 only, left) or conditions where a 4 mM NAA (middle) or K-NAA (right) solution in M9 buffer containing NA22 was perfused through the microfluidic chamber for the time indicated (Keil et al. 2017). Anterior is left and ventral is down. (F) Rates of degradation were determined by quantifying AID::GFP in whole animals following auxin treatment. Data presented as the mean $\pm$ SD ( $n \geq 4$  animals examined for each time point).

Martinez, et al. (2019)

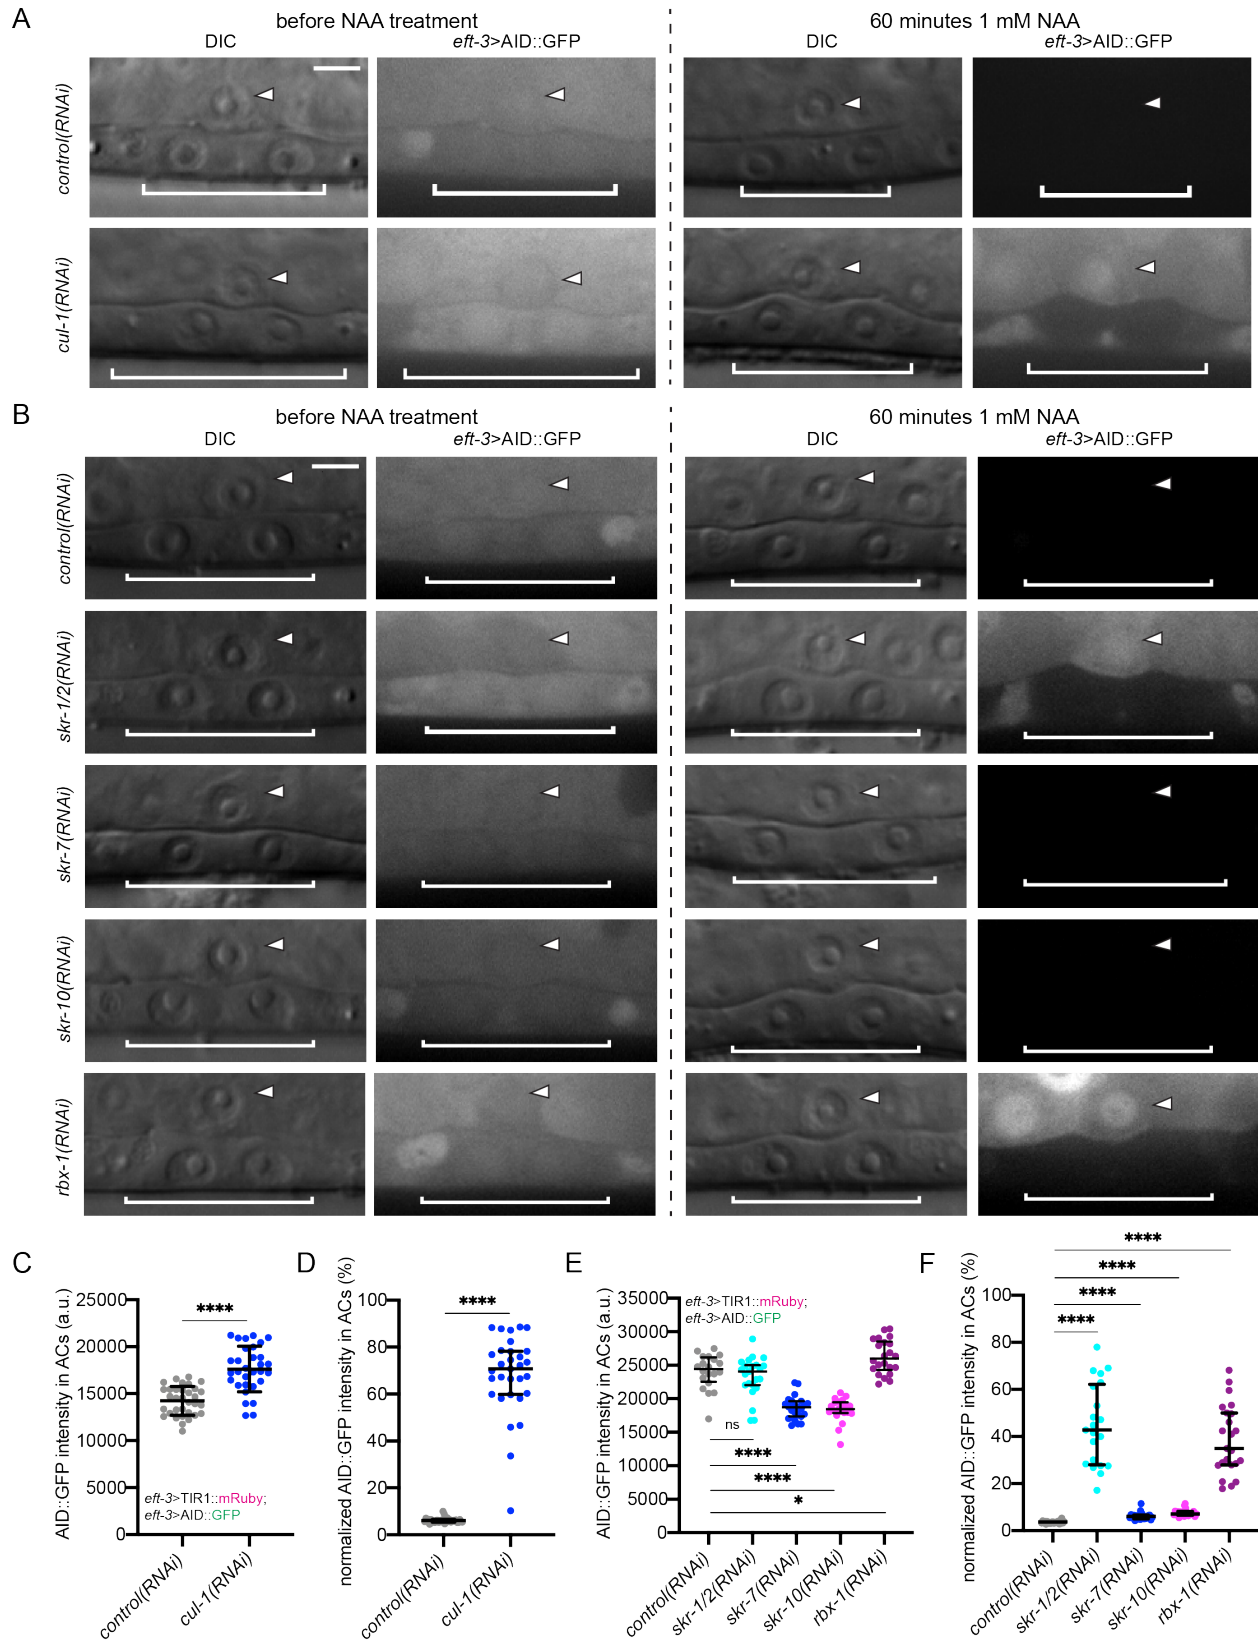

Martinez, et al. (2019)

**Figure 4. Suppression of SCF complex member expression inhibits TIR1-dependent degradation in the *C. elegans* AC.** (A-B) DIC and corresponding GFP images of ACs (arrowheads) and underlying VPCs (brackets) from mid-L3 stage animals at the P6.p 2-cell stage. Animals expressing AID::GFP and TIR1::mRuby under the same *eft-3* promoter were treated with (A) *cul-1(RNAi)* and (B) *skr-1/2*, *skr-7*, *skr-10* and *rbx-1(RNAi)*. (C) Quantification of AID::GFP in ACs following *cul-1(RNAi)* treatment. Data presented as the mean±SD ( $n \geq 30$  animals examined for each, and  $P < 0.0001$  by a Student's t-test). (D) Quantification of AID::GFP in ACs following treatment with NAA. Data presented as the median+IQR ( $n \geq 30$  animals examined for each, and  $P < 0.0001$  by a Mann Whitney U test). (E) Quantification of AID::GFP in ACs following RNAi knockdown of Skp1-related (*skr*) genes and *rbx-1*. Data presented as the median+IQR ( $n \geq 20$  animals examined for each, and  $P$  values examined by a Mann Whitney U test). (F) Quantification of AID::GFP in ACs following treatment with NAA. Data presented as the median+IQR ( $n \geq 21$  animals examined for each, and  $P$  values examined by a Mann Whitney U test).

Martinez, et al. (2019)

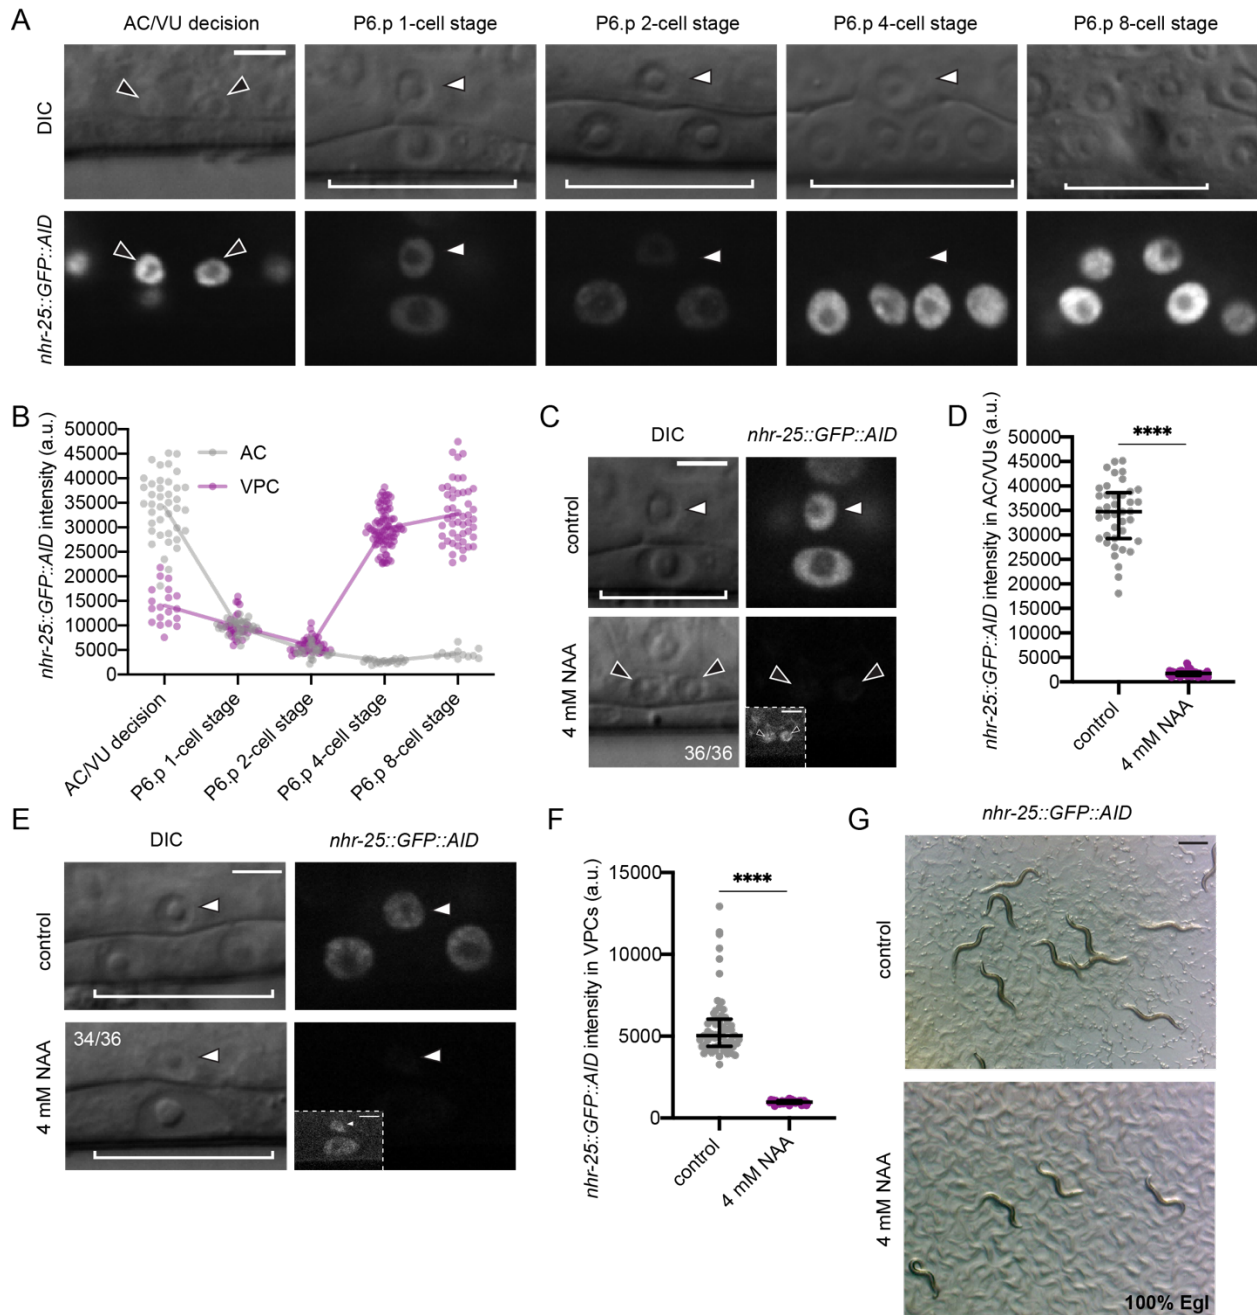

**Figure 5. NAA-mediated degradation of NHR-25 causes AC specification and VPC division defects.** (A) *nhr-25::GFP::AID* localizes to the nuclei of the AC/VU (black arrowheads), the AC (white arrowheads) and VPCs (brackets). At P6.p 8-cell stage (far right) the AC is not in the same focal plane as the 1° VPCs. (B) Quantification of *nhr-*

Martinez, et al. (2019)

25::*GFP*::*AID* over developmental time, from the AC/VU decision to the P6.p 8-cell stage. The curve is connected by the mean at each developmental stage ( $n = 20, 31, 20, 21,$  and 12 animals quantified, respectively). (C) DIC and corresponding GFP images of ACs (arrowheads) and underlying VPCs (brackets) from early L3 stage animals. Animals expressing *nhr-25*::*AID*::*GFP* and *eft-3*>*TIR1*::mRuby were treated with control and 4 mM NAA. (D) Quantification of *nhr-25*::*GFP*::*AID* in AC/VUs following NAA treatment. Data presented as the median+IQR ( $n \geq 20$  animals examined for each, and  $P < 0.0001$  by a Mann Whitney U test). (E) DIC and corresponding GFP images of ACs (arrowheads) and underlying VPCs (brackets) from mid-L3 stage animals. Animals expressing *nhr-25*::*AID*::*GFP* and *eft-3*>*TIR1*::mRuby were treated with control and 4 mM NAA. (F) Quantification of *nhr-25*::*GFP*::*AID* in VPCs following NAA treatment. Data presented as the median+IQR ( $n \geq 30$  animals examined for each, and  $P < 0.0001$  by a Mann Whitney U test). (G) Representative images of adult plate level phenotypes following control and 4 mM NAA treatments added at the L3 stage ( $n \geq 30$  animals examined). Scale bar in (G), 500  $\mu\text{m}$ .
